# Supplementary material
Source: publisher site journal article supplement (https://static.cambridge.org/content/id/urn:cambridge.org:id:article:S1047951120002012/resource/name/S1047951120002012supp003.docx)
Supplement: Supplementary file 1 [file S1047951120002012supp003.docx]

| **Variable** | **Derivation**  **n=981 (%)** | | **Validation**  **n=488 (%)** | | | **p-value** |
| --- | --- | --- | --- | --- | --- | --- |
| **Age at surgery** |  |  |  | |  | **0.02** |
| <1 | 484 | (49.3) | 261 | (53.5) | |  |
| 1-18 | 396 | (40.4) | 187 | (38.3) | |  |
| 19-64 | 90 | (9.2) | 28 | (5.7) | |  |
| 65+ | 11 | (1.1) | 12 | (2.5) | |  |
| **Male** | 509 | (51.9) | 274 | (56.2) | | 0.12 |
| **Race** |  |  |  |  | | 0.41 |
| White | 568 | (57.9) | 297 | (60.9) | |  |
| Black | 326 | (33.2) | 156 | (32.0) | |  |
| Other | 87 | (8.9) | 35 | (7.2) | |  |
| **CHD Severity** |  |  |  |  | | 0.39 |
| Severe | 481 | (49.0) | 251 | (51.4) | |  |
| Not severe | 500 | (51.0) | 237 | (48.6) | |  |
| **Insurance Payer** |  |  |  |  | | **0.003** |
| Government | 572 | (58.3) | 319 | (65.3) | |  |
| Private | 378 | (38.5) | 150 | (31.8) | |  |
| None | 20 | (2.0) | 3 | (0.6) | |  |
| Other/Unknown | 11 | (1.1) | 11 | (2.3) | |  |
| **Previous cardiac surgery** | 290 | (29.6) | 161 | (33.0) | | 0.18 |
| **LOS (surgery to discharge)** |  |  |  |  | | 0.37 |
| ≤1 week | 754 | (76.9) | 359 | (73.6) | |  |
| >1 week, ≤2 weeks | 161 | (16.4) | 93 | (19.1) | |  |
| >2 weeks, ≤1 month | 66 | (6.7) | 36 | (7.4) | |  |
| **In-Hospital Complication** |  |  |  |  | | 0.21 |
| Complication | 407 | (41.5) | 186 | (38.1) | |  |
| No Complication | 574 | (58.5) | 302 | (61.9) | |  |
| **Number of surgery types at index hospitalization** |  |  |  |  | | 0.29 |
| 1 | 573 | (58.4) | 264 | (54.1) | |  |
| 2 | 269 | (27.4) | 147 | (30.1) | |  |
| ≥3 | 139 | (14.2) | 77 | (15.8) | |  |
| **Surgery Type** |  |  |  |  | |  |
| Electrophysiology/Pacemaker | 32 | (3.3) | 20 | (4.1) | | 0.41 |
| Surgery on Heart and Great Vessels | 31 | (3.2) | 19 | (3.9) | | 0.47 |
| Valve Surgery | 237 | (24.2) | 98 | (20.1) | | 0.08 |
| Single Ventricle Repair, Shunt Procedures | 205 | (20.9) | 102 | (20.9) | | 0.99 |
| Septal Defect Repair | 552 | (56.3) | 291 | (59.6) | | 0.22 |
| Sinus Valsalva/Venous Anomaly Repair | 51 | (5.2) | 18 | (3.7) | | 0.20 |
| TGA Repair | 47 | (4.8) | 23 | (4.7) | | 0.95 |
| Truncus Repair | 7 | (0.7) | 2 | (0.4) | | 0.73 |
| Aortic Anomaly Repair | 130 | (13.3) | 62 | (12.7) | | 0.77 |
| Pulmonary Artery Surgery | 109 | (11.1) | 79 | (16.9) | | **0.01** |
| Heart Transplant | 34 | (3.5) | 18 | (3.7) | | 0.83 |
| Other | 137 | (14.0) | 77 | (15.8) | | 0.35 |
| **Day of Week of Discharge** |  |  |  |  | | 0.41 |
| Friday or Saturday | 297 | (30.3) | 158 | (32.4) | |  |
| Sunday-Thursday | 684 | (69.7) | 330 | (67.6) | |  |
| **Comorbidities** |  |  |  |  | |  |
| Cardiac disease | 350 | (35.7) | 123 | (25.2) | | **<0.001** |
| Pulmonary disease | 110 | (11.2) | 48 | (9.8) | | 0.42 |
| Pulmonary hypertension | 6 | (0.6) | 0 | (0.0) | | 0.19 |
| Renal disease | 14 | (1.4) | 11 | (2.3) | | 0.25 |
| Hepatic disease | 30 | (3.1) | 16 | (3.3) | | 0.81 |
| Neurologic disease | 26 | (2.7) | 10 | (2.1) | | 0.48 |
| Hematologic disease | 137 | (14.0) | 57 | (11.7) | | 0.22 |
| Nutritional | 260 | (26.5) | 169 | (34.6) | | **0.001** |
| Endocrine disease | 48 | (4.9) | 24 | (4.9) | | 0.98 |
| Genetic syndromes | 43 | (4.4) | 32 | (6.6) | | 0.07 |

Abbreviations: CHD=congenital heart disease, LOS=length of stay, TGA=transposition of the great arteries
